# Supplementary material
Source: Research Square preprint supplement (doi:10.21203/rs.3.rs-8856042/v1)
Supplement: Supplementary file 1 [file 2885234e9e493572b28507b6.docx]

| **Table 1. COST Questionnaire item revisions through translation process.** | | | | |
| --- | --- | --- | --- | --- |
| **Item** | **English Source** | **Description of translation or linguistic issue** | **Consensus & Resolution** | **Final Odia Version** |
| FT1 | I know that I have enough money in savings, retirement, or assets to cover the costs of my treatment | **Translation:**  Spelling of "ଖର୍ଚ୍ଚ" or "ଖର୍ଚ" to denote expenses and costs | **Translation:**  Used the word "ଖର୍ଚ୍ଚ" NOT "ଖର୍ଚ" to best capture the meaning and pronunciation. | ମୁଁ ଜାଣିଛି ଯେ ମୋର ଚିକିତ୍ସା ଖର୍ଚ୍ଚ ପୂରଣ କରିବା ପାଇଁ ମୋର ସଞ୍ଚୟ, ପେନ୍ସନ, କିମ୍ବା ସମ୍ପତ୍ତିରେ ଯଥେଷ୍ଟ ଟଙ୍କା ଅଛି |
| **Pilot:**  Discrepancy with how “Money” was translated between items FT1 and FT4, “ଅର୍ଥ “and “ଟଙ୍କା” | **Pilot:**  ଟଙ୍କା was chosen as it is the most used and understood by the public in Odisha. |
| FT2 | My out-of-pocket medical expenses are more than I  thought they would be | **Translation:**  Spelling of "ଖର୍ଚ୍ଚ" or "ଖର୍ଚ" to denote expenses and costs    Concern that the reconciliation does not directly translate the phrase "out-of-pocket" | **Translation:**  Used the word "ଖର୍ଚ୍ଚ" NOT "ଖର୍ଚ" to best capture the meaning and pronunciation.  Used language capturing the concept of paying for medical expenses with “personal funds” | ମୋର ବ୍ୟକ୍ତିଗତ ଚିକିତ୍ସା ଖର୍ଚ୍ଚ ମୁଁ ଯେତକି ଭାବିଥିଲି ତାଠାରୁ ଅଧିକ ହୋଇଛି |
| **Pilot:**  No issues | **Pilot:**  N/A |
| FT3 | I worry about the financial problems I will have in the  future as a result of my illness or treatment | **Translation:**  Neither forward translation best captured “as a result of”.  Uncertainty over the function of "ଜନିତ" in the reconciliation and whether it reflects the English source [“as a result of”] | **Translation:**  Linguist provided best suited translation for “as a result of” in the reconciliation. | ମୁଁ ଆଗକୁ ମୋର ଅସୁସ୍ଥତା କିମ୍ବା ଚିକିତ୍ସା ହେତୁ ଭବିଷ୍ୟତରେ ଆର୍ଥିକ ସମସ୍ୟା ନେଇ ଚିନ୍ତିତ |
| **Pilot:**  Inconsistent with translation memory: "illness" | **Pilot:**  Modified for consistency with translation memory: “ଅସୁସ୍ଥତା” |
| FT4 | I feel I have no choice about the amount of money I spend on care | **Translation:** Spelling of "ଖର୍ଚ୍ଚ" or "ଖର୍ଚ" to denote expenses and costs  Concerns about the word “choice” and difference between not having any options rather than conveying the restricted feeling about the specific amount spent on care. | **Translation:**  Used the word "ଖର୍ଚ୍ଚ" NOT "ଖର୍ଚ" to best capture the meaning and pronunciation.  “option” is the closest word to “choice” and best to use in this context and final translation speaks to their sentiment towards the constrained choices regarding cost of care spending. | ମୋତେ ଲାଗୁଛି ମୁଁ ମୋର ଚିକିତ୍ସା ଉପରେ ଖର୍ଚ୍ଚ କରିବାକୁ ଟଙ୍କା ରାଶି ନେଇ ମୋ ପାଖରେ କୌଣସି ବିକଳ୍ପ ନାହିଁ |
| **Pilot:**  Discrepancy with how “Money” was translated between items FT1 and FT4, “ଅର୍ଥ “and “ଟଙ୍କା” | **Pilot:**  ଟଙ୍କା was chosen as it is the most used and understood by the public in Odisha. |
| FT5 | I am frustrated that I cannot work or contribute as much as I usually do | **Translation:**   Inconsistency with translation memory: translation of “frustrated” and the syntax of the sentence.    Missing word: “contribution” missing. | **Translation:**  The syntax remains different as the translation offers the use of the word differently than the English source. Reconciliation version chosen.  The word “contribution” added. | ମୁଁ ନିରାଶ ହେଉଛି ଯେ ସାଧାରଣତଃ ଯେତେକି କାମ କିମ୍ବା ଅବଦାନ ଦେଇପାରୁଥାନ୍ତି, ସେତିକି କରିପାରୁ ନାହିଁ |
| **Pilot:**  No issues | **Pilot:**  N/A |
| FT6 | I am satisfied with my current financial situation | **Translation:**  Inconsistent with translation memory: placement of 'ମୁଁ', 'I'    Suggestion to remove the full stop from final translation. | **Translation:**  Chosen to deviate from the translation memory.    Full stop removed from final translation. | ମୁଁ ମୋର ବର୍ତ୍ତମାନର ଆର୍ଥିକ ପରିସ୍ଥିତି ସହିତ ସନ୍ତୁଷ୍ଟ ଅଛି |
| **Pilot:**  Discrepancy with how “Financial Situation” was translated between items FT6, FT10 and FT11 | **Pilot:**  ଆର୍ଥିକ ସ୍ଥିତି best translation for “Financial Situation”. Final translation edited. |
| FT7 | I am able to meet my monthly expenses | **Translation:**  Suggestion to remove the full stop from final translation.  Spelling of "ଖର୍ଚ୍ଚ" or "ଖର୍ଚ" to denote expenses and costs  Necessity of the term: “ଅଛି।“ | **Translation:**  Full stop removed from final translation.  Used the word "ଖର୍ଚ୍ଚ" NOT "ଖର୍ଚ" to best capture the meaning and pronunciation.  Kept ଅଛି। as it denotes “am” and better completes the sentence. | ମୁଁ ମାସିକ ଖର୍ଚ୍ଚ ପୂରଣ କରିବାରେ ସକ୍ଷମ ଅଛି |
| **Pilot:**  No issues | **Pilot:**  N/A |
| FT8 | I feel financially stressed | **Translation:**  Suggestion to remove the full stop from final translation  Grammatical error: "ଚାପରେ"  Suggestions for faithful rendering of the source: ('ଥିଲା', 'was') ('ପରି', 'Like') | **Translation:**   Full stop removed.    Used “ଚାପ”, meaning stress or pressure. | ମୁଁ ଅର୍ଥନୈତିକ ଚାପ ଅନୁଭବ କରୁଛି |
| **Pilot:**  No issues | **Pilot:**  N/A |
| FT9 | I am concerned about keeping my job and income, including paid work at home | **Translation:**  Suggestion to remove the full stop from final translation.  Syntax is different.  Concern with “paid” vs “unpaid” work expressed in the relation. | **Translation:**  Full stop removed.    Modified the position of ମୁଁ in the translation.  “paid” work is solely reflected in translation. | ମୁଁ ମୋର ଚାକିରି ଓ ଆୟ (ଘରେ କରୁଥିବା ବେତନିକ କାର୍ଯ୍ୟ ସହିତ) କୁ ରକ୍ଷା କରିବାକୁ ନେଇ ଚିନ୍ତିତ ଅଛି |
| **Pilot:**  Inconsistent with translation memory: “concerned”    Concept of “paid” work at home not well understood by the population. | **Pilot:**  Modified for consistency with translation memory: ଚିନ୍ତିତ   Despite poor understanding of the concept, “paid work at home” remains in final translation for consistency with English source. |
| FT10 | My cancer or treatment has reduced my satisfaction with my present financial situation | **Translation:**  Suggestion to remove the full stop from final translation.  Suggestion that the correct form of "ସନ୍ତୁଷ୍ଟିକୁ" should be "ସନ୍ତୁଷ୍ଟି" and that the correct phrase is "ଆର୍ଥିକ ସ୍ଥିତିରେ ସନ୍ତୁଷ୍ଟି", meaning "satisfaction in financial status". | **Translation:**  Full stop removed.  Agreed with the FACIT analysis on the correct form of "ସନ୍ତୁଷ୍ଟି" to denote satisfaction in the translation. | ମୋର କ୍ୟାନ୍ସର ବା ତାହାର ଚିକିତ୍ସା ମୋର ବର୍ତ୍ତମାନ ଆର୍ଥିକ ପରିସ୍ଥିତିରେ ସନ୍ତୁଷ୍ଟି କମାଇ ଦେଇଛି |
|  |  | **Pilot:**  Discrepancy with how “Financial Situation” was translated between items FT6, FT10 and FT11 | **Pilot:**  Maintained translation and modified FT6. |  |
| FT11 | I feel in control of my financial situation | **Translation:**  Suggestion to remove the full stop from final translation. | **Translation:**  Full stop removed. | ମୁଁ ମୋର ଆର୍ଥିକ ପରିସ୍ଥିତି ଉପରେ ନିୟନ୍ତ୍ରଣରେ ଅଛି ବୋଲି ଅନୁଭବ କରୁଛି |
| **Pilot:**  Discrepancy with how “Financial Situation” was translated between items FT6, FT10 and FT11 | **Pilot:**  Maintained translation and modified FT6. |
| FT12 | My illness has been a financial hardship to my family and me | **Translation:**  Suggestion to remove the full stop from final translation.    Concern over the intended meaning of "financial hardship" and avoiding terms equivalent to “crisis”. | **Translation:**  Full stop removed.      Used “ଅର୍ଥନୈତିକ ଅସୁବିଧା” to denote financial hardship. | ମୋର ଅସୁସ୍ଥତା ମୋର ପରିବାର ଓ ମୋ ପାଇଁ ଅର୍ଥନୈତିକ ଅସୁବିଧା ହୋଇଛି |
| **Pilot:**  Inconsistent with translation memory: “illness” | **Pilot:**  Modified for consistency with translation memory: “ଅସୁସ୍ଥତା” |
